# Supplementary material for: Significance of MnO2 Type and Solution Parameters in Manganese Removal from Water Solution
Source: MDPI journal article supplement (doi:10.3390/ijms24054448), 2023-02-23
Supplement: s1 [file s1]

## SUPPLEMENTARY MATERIALS

### Significance of MnO<sub>2</sub> type and solution parameters in manganese removal from water solution

Magdalena M. Michel <sup>1</sup>, Mostafa Azizi <sup>1,\*</sup>, Dorota Mirosław-Świątek <sup>1</sup>, Lidia Reczek <sup>1</sup>, Bogumił Cieniek <sup>2</sup>, and Eleonora Sočo <sup>3</sup>

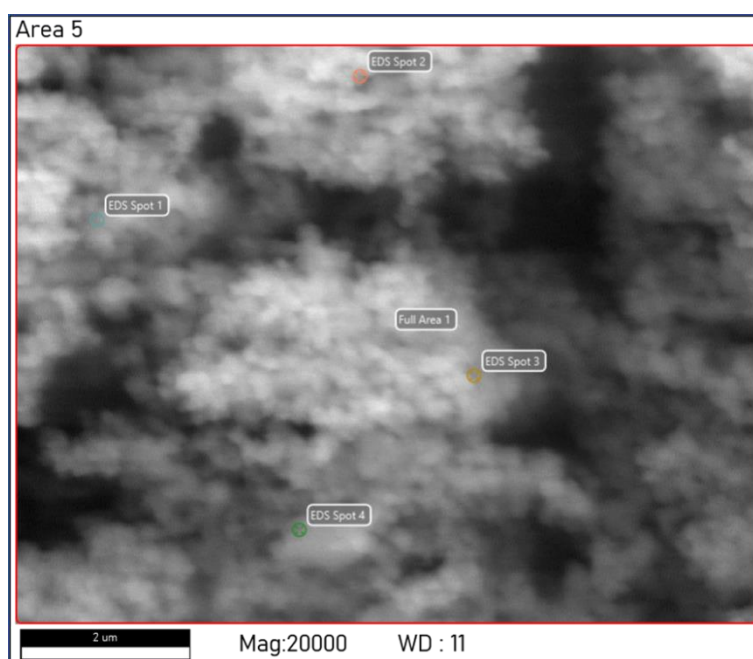

(a)

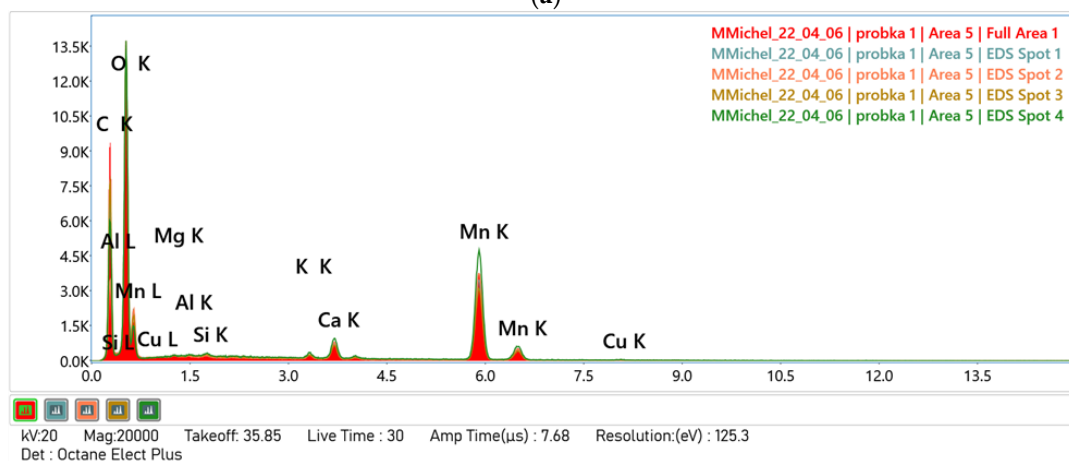

(b)

**Figure S1.** SEM-EDS analysis of AKH surface: (a) The location of the measurement spots 1–4; (b) The spectra obtained from the measurement spots 1–4.

**Table S1.** Element composition of AKH surface, atomic %.

| Element | Spot 1 | Spot 2 | Spot 3 | Spot 4 |
|---------|--------|--------|--------|--------|
| C       | 36.9   | 17.8   | 39.8   | 40.5   |
| O       | 49.1   | 56.4   | 50.4   | 47.8   |
| Mn      | 11.7   | 21.9   | 8.4    | 10.1   |
| Mg      | 0.3    | 0.3    | 0.1    | 0.1    |
| Al      | 0.1    | 0.2    | 0.1    | n.d.   |
| Si      | 0.1    | 0.2    | 0.1    | 0.1    |
| K       | 0.3    | 0.6    | 0.2    | 0.2    |
| Cu      | 0.1    | n.d.   | n.d.   | n.d.   |
| Ca      | 1.3    | 2.6    | 1.0    | 1.1    |

n.d. – not detected.

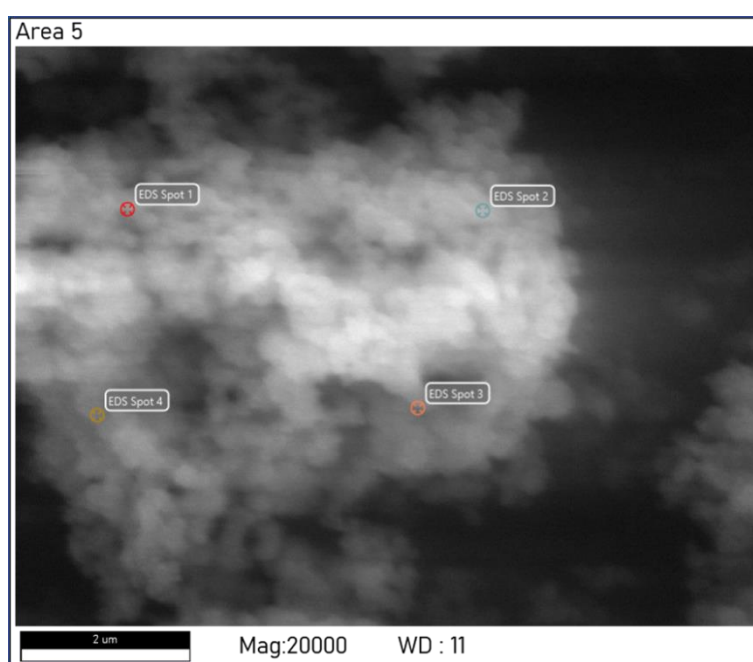

(a)

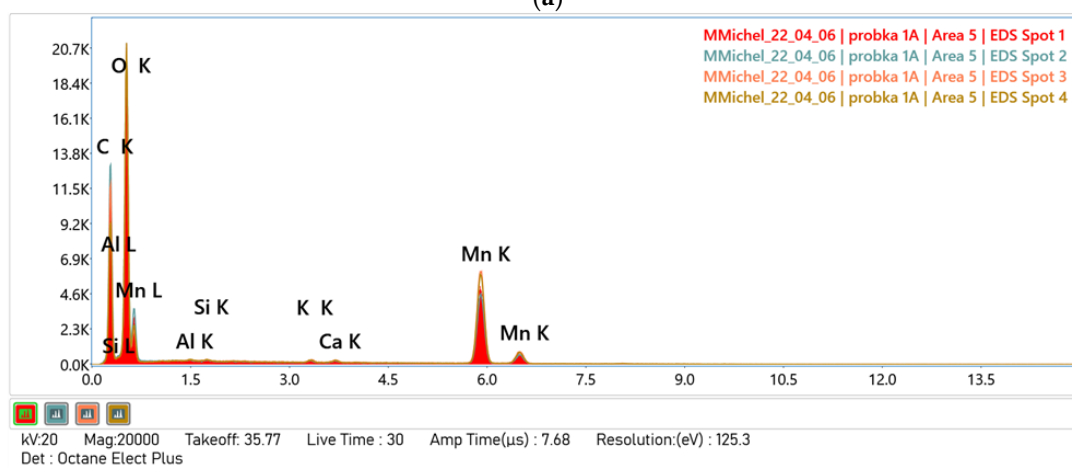

(b)

**Figure S2.** SEM-EDS analysis of AKH surface after Mn adsorption: (a) The location of the measurement spots 1–4; (b) The spectra obtained from the measurement spots 1–4.

**Table S2.** Element composition of AKH surface after Mn adsorption, atomic %.

| Element | Spot 1 | Spot 2 | Spot 3 | Spot 4 |
|---------|--------|--------|--------|--------|
| C       | 32.6   | 42.6   | 39.2   | 38.9   |
| O       | 59.9   | 52.7   | 53.9   | 54.2   |
| Mn      | 7.0    | 4.4    | 6.6    | 6.5    |
| Al      | 0.2    | 0.1    | 0.1    | 0.1    |
| Si      | 0.1    | n.d.   | n.d.   | 0.1    |
| K       | 0.1    | 0.1    | 0.1    | 0.1    |
| Ca      | 0.1    | 0.1    | 0.1    | 0.1    |

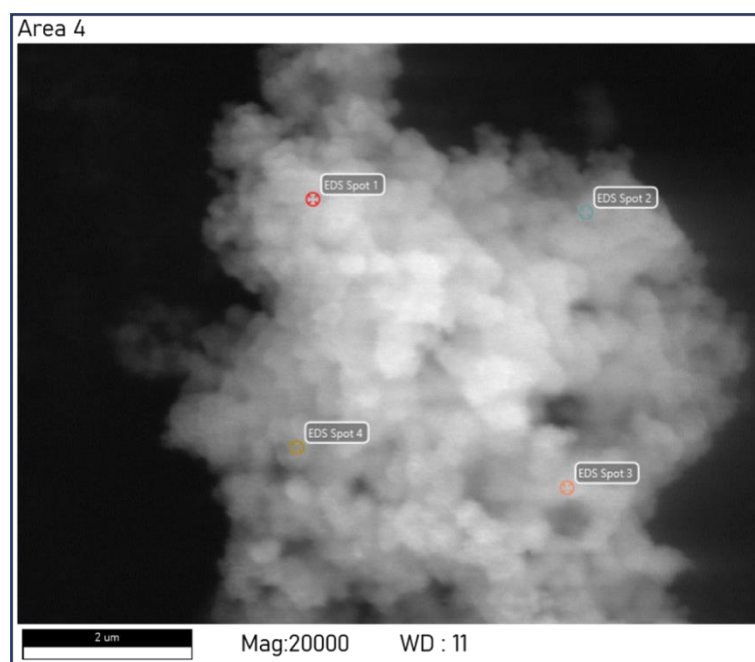

(a)

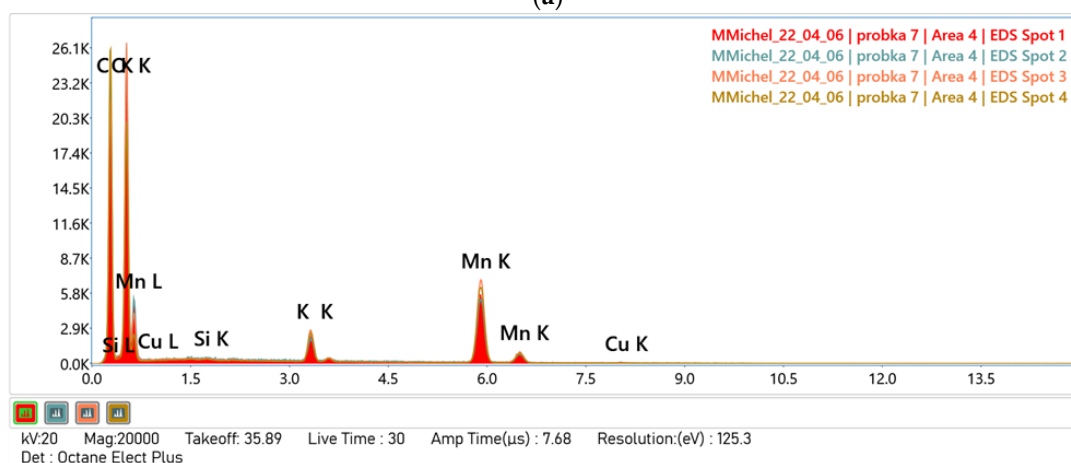

(b)

**Figure S3.** SEM-EDS analysis of BIR surface: (a) The location of the measurement spots 1–4; (b) The spectra obtained from the measurement spots 1–4.

**Table S3.** Element composition of BIR surface, atomic %.

| Element | Spot 1 | Spot 2 | Spot 3 | Spot 4 |
|---------|--------|--------|--------|--------|
| C       | 52.6   | 55.1   | 53.2   | 60.4   |
| O       | 44.0   | 42.0   | 42.8   | 35.9   |
| Mn      | 2.8    | 2.4    | 3.3    | 3.0    |
| K       | 0.6    | 0.4    | 0.7    | 0.6    |
| Cu      | n.d.   | 0.1    | n.d.   | n.d.   |

n.d. – not detected.

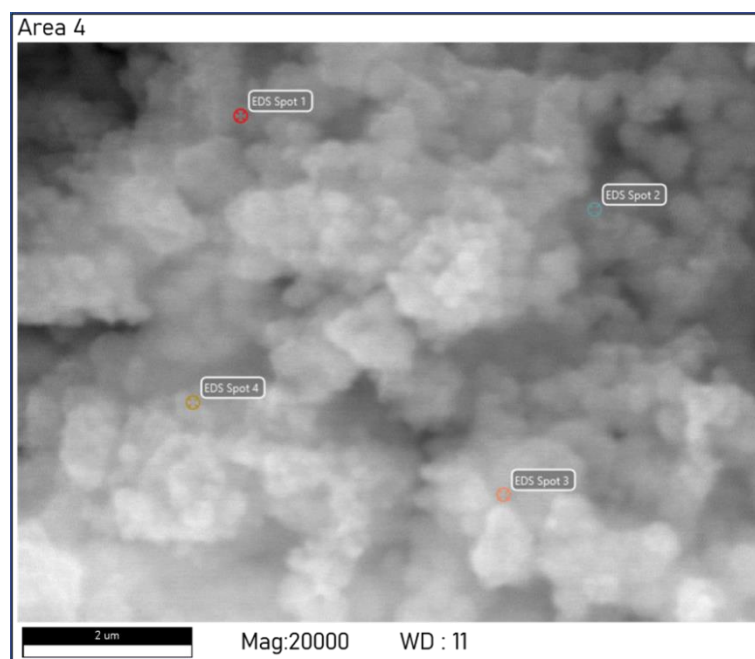

(a)

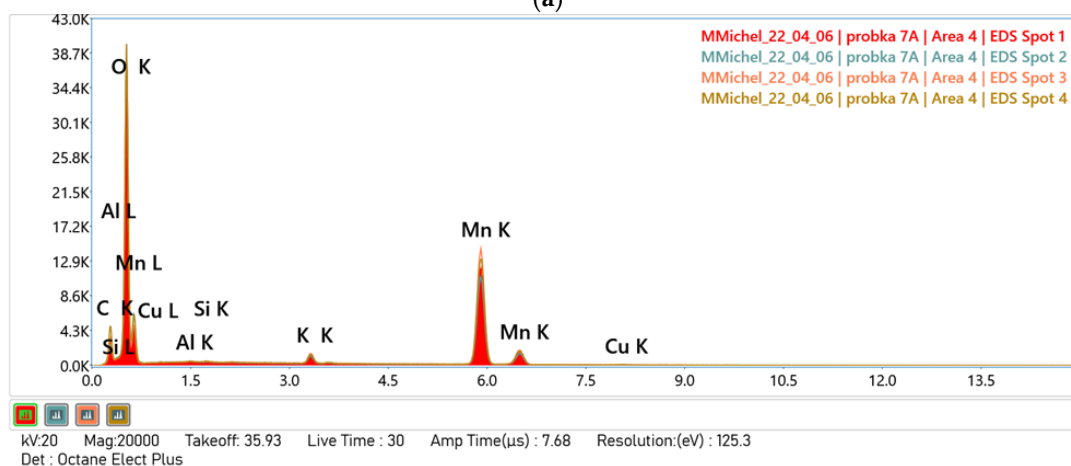

(b)

**Figure S4.** SEM-EDS analysis of BIR surface after Mn adsorption: (a) The location of the measurement spots 1–4; (b) The spectra obtained from the measurement spots 1–4.

**Table S4.** Element composition of BIR surface after Mn adsorption, atomic %.

| Element | Spot 1 | Spot 2 | Spot 3 | Spot 4 |
|---------|--------|--------|--------|--------|
| C       | 13.8   | 8.9    | 11.0   | 22.4   |
| O       | 69.6   | 72.9   | 67.0   | 64.0   |
| Mn      | 15.6   | 16.6   | 20.3   | 12.6   |
| Al      | 0.3    | 0.5    | 0.4    | 0.2    |
| Si      | n.d.   | 0.2    | 0.1    | 0.1    |
| K       | 0.7    | 0.8    | 0.9    | 0.6    |
| Cu      | n.d.   | 0.1    | 0.2    | 0.1    |

n.d. – not detected.

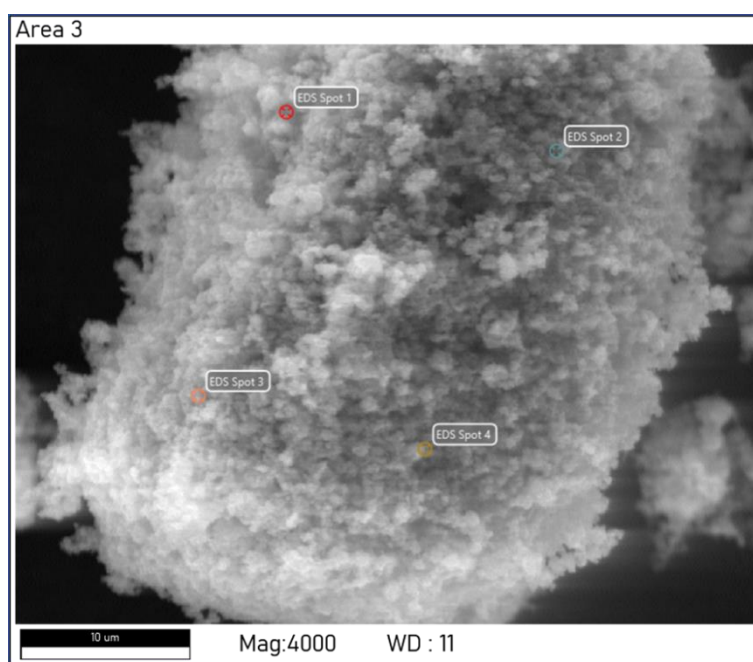

(a)

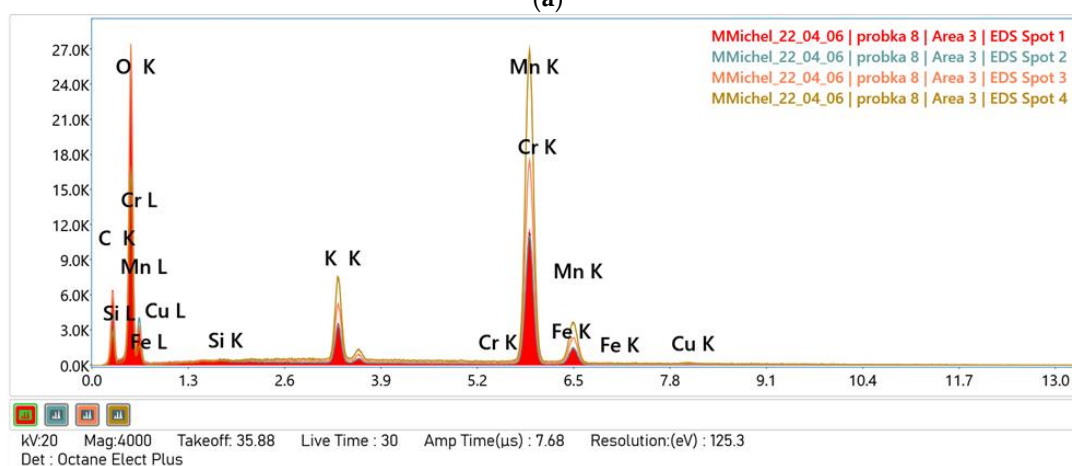

(b)

**Figure S5.** SEM-EDS analysis of CRY surface: (a) The location of the measurement spots 1–3; (b) The spectra obtained from the measurement spots 1–3.

**Table S5.** Element composition of CRY surface, atomic %.

| Element | Spot 1 | Spot 2 | Spot 3 |
|---------|--------|--------|--------|
| C       | 33.5   | 20.1   | 26.7   |
| O       | 54.9   | 62.2   | 52.3   |
| Mn      | 9.9    | 15.1   | 18.0   |
| Fe      | n.d.   | 0.1    | 0.2    |
| K       | 1.6    | 2.4    | 2.7    |
| Cu      | 0.1    | 0.1    | 0.1    |

n.d. – not detected.

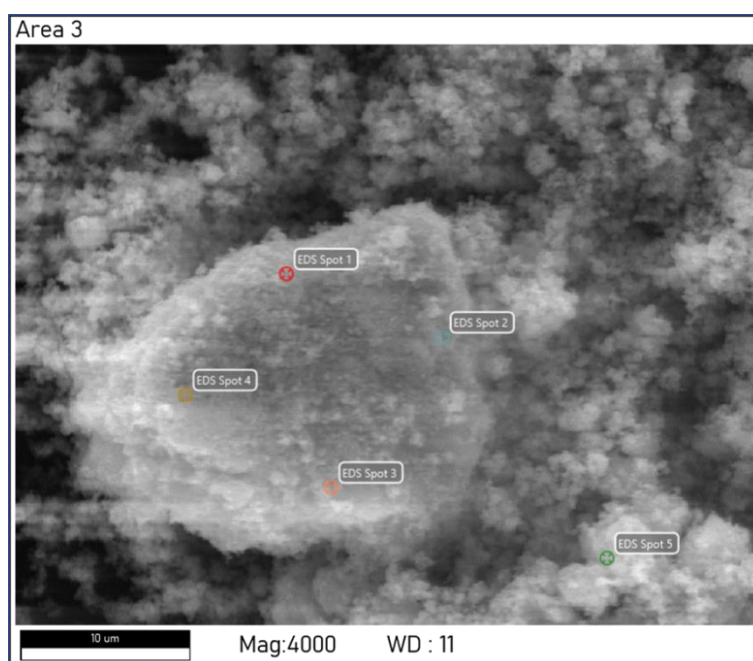

(a)

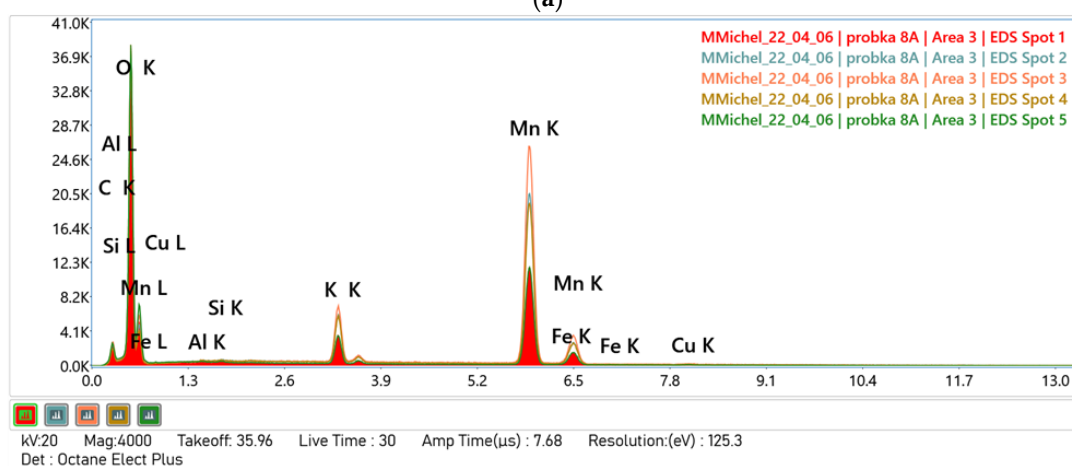

(b)

**Figure S6.** SEM-EDS analysis of CRY surface after Mn adsorption: (a) The location of the measurement spots 1–4; (b) The spectra obtained from the measurement spots 1–5.

**Table S6.** Element composition of CRY surface after Mn adsorption, in atomic %.

| Element | Spot 1 | Spot 2 | Spot 3 | Spot 4 | Spot 5 |
|---------|--------|--------|--------|--------|--------|
| C       | 12.7   | 7.9    | 12.7   | 9.8    | 10.8   |
| O       | 71.1   | 64.5   | 59.8   | 66.6   | 72.7   |
| Mn      | 13.6   | 23.8   | 23.9   | 20.4   | 14.1   |
| Al      | 0.2    | n.d.   | n.d.   | n.d.   | n.d    |
| Si      | n.d.   | n.d.   | n.d.   | n.d.   | 0.2    |
| Fe      | 0.1    | 0.2    | 0.3    | n.d.   | n.d    |
| K       | 2.1    | 3.5    | 3.2    | 3.1    | 2.1    |
| Cu      | 0.1    | 0.1    | 0.2    | 0.2    | 0.1    |

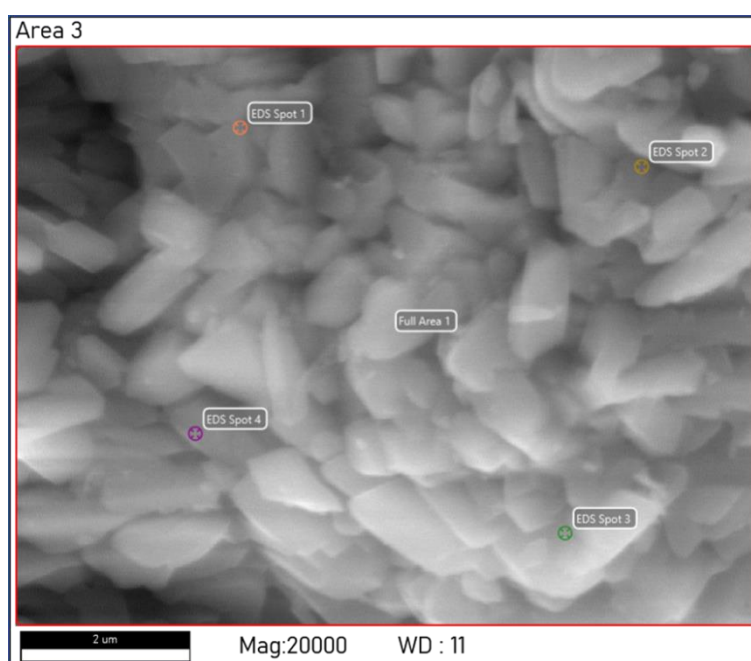

(a)

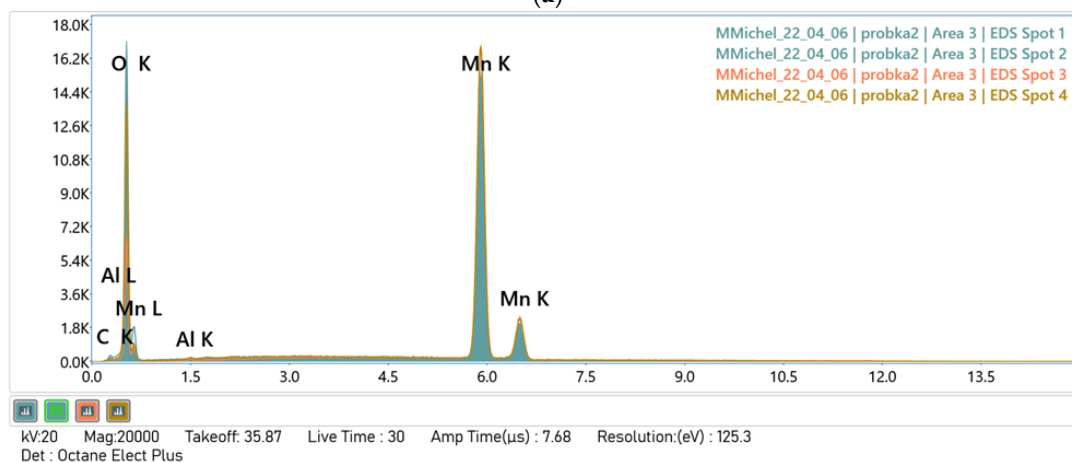

(b)

**Figure S7.** SEM-EDS analysis of PYR surface: (a) The location of the measurement spots 1–4; (b) The spectra obtained from the measurement spots 1–4.



**Table S7.** Element composition of PYR surface, atomic %.

| Element | Spot 1 | Spot 2 | Spot 3 | Spot 4 |
|---------|--------|--------|--------|--------|
| C       | 6.9    | n.d.   | n.d.   | n.d.   |
| O       | 65.5   | 56.9   | 31.9   | 46.9   |
| Mn      | 27.5   | 43.1   | 68.1   | 53.1   |
| Al      | 0.2    | n.d.   | n.d.   | n.d.   |

n.d. – not detected.

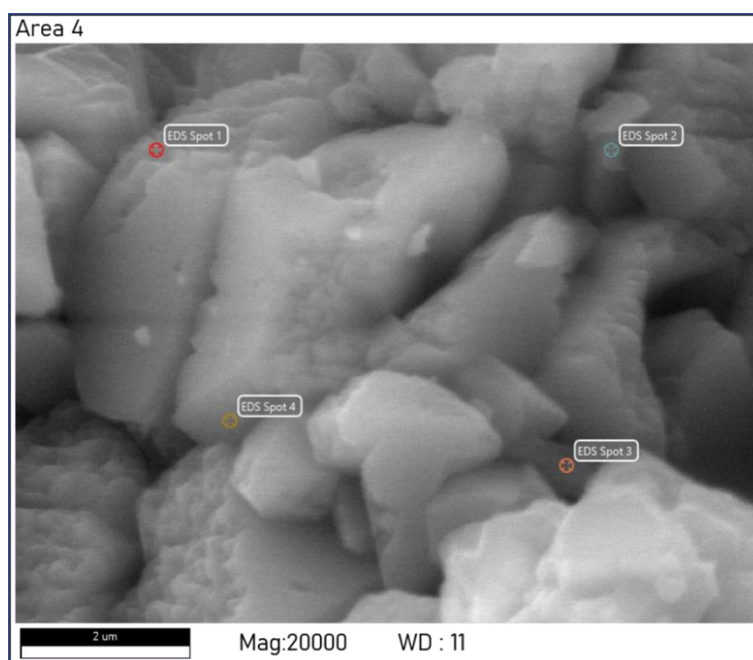

(a)

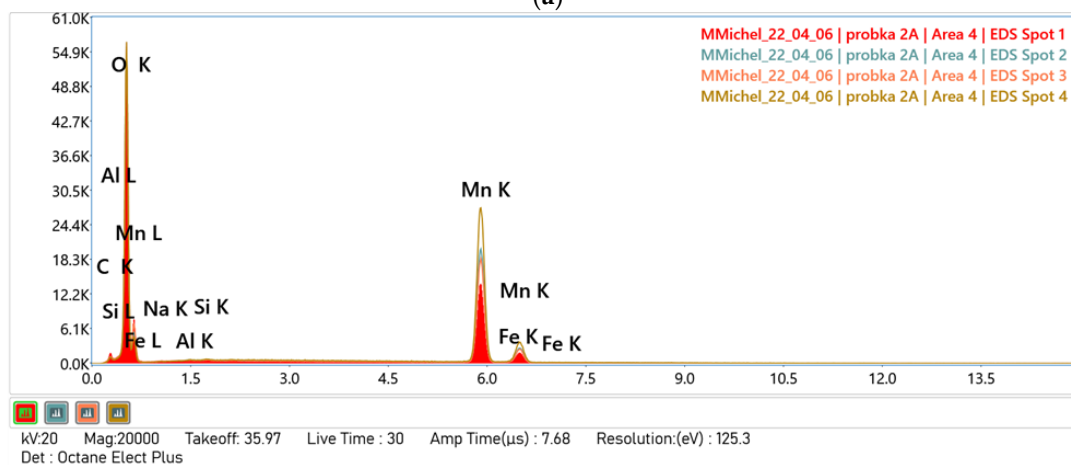

(b)

**Figure S8.** SEM-EDS analysis of PYR surface after Mn adsorption: (a) The location of the measurement spots 1–4; (b) The spectra obtained from the measurement spots 1–4.



**Table S8.** Element composition of PYR surface after Mn adsorption, atomic %.

| <b>Element</b> | <b>Spot 1</b> | <b>Spot 2</b> | <b>Spot 3</b> | <b>Spot 4</b> |
|----------------|---------------|---------------|---------------|---------------|
| C              | 14.9          | 7.4           | 11.5          | 5.2           |
| O              | 70.4          | 69.2          | 70.6          | 67.5          |
| Mn             | 14.0          | 22.0          | 17.7          | 27.3          |
| Al             | 0.4           | 0.2           | 0.2           | n.d.          |
| Si             | 0.2           | 0.1           | 0.1           | n.d.          |
| Na             | n.d.          | 1.0           | n.d.          | n.d.          |
| Fe             | 0.1           | n.d.          | n.d.          | n.d.          |
